# Supplementary material for: At least two well-spaced samples are needed to genotype a solid tumor
Source: PubMed Central journal article supplement (PMC4807557; doi:10.1186/s12885-016-2202-8), 2016-03-25
Supplement: 12885_2016_2202_MOESM2_ESM.pdf [file 12885_2016_2202_MOESM2_ESM.pdf]

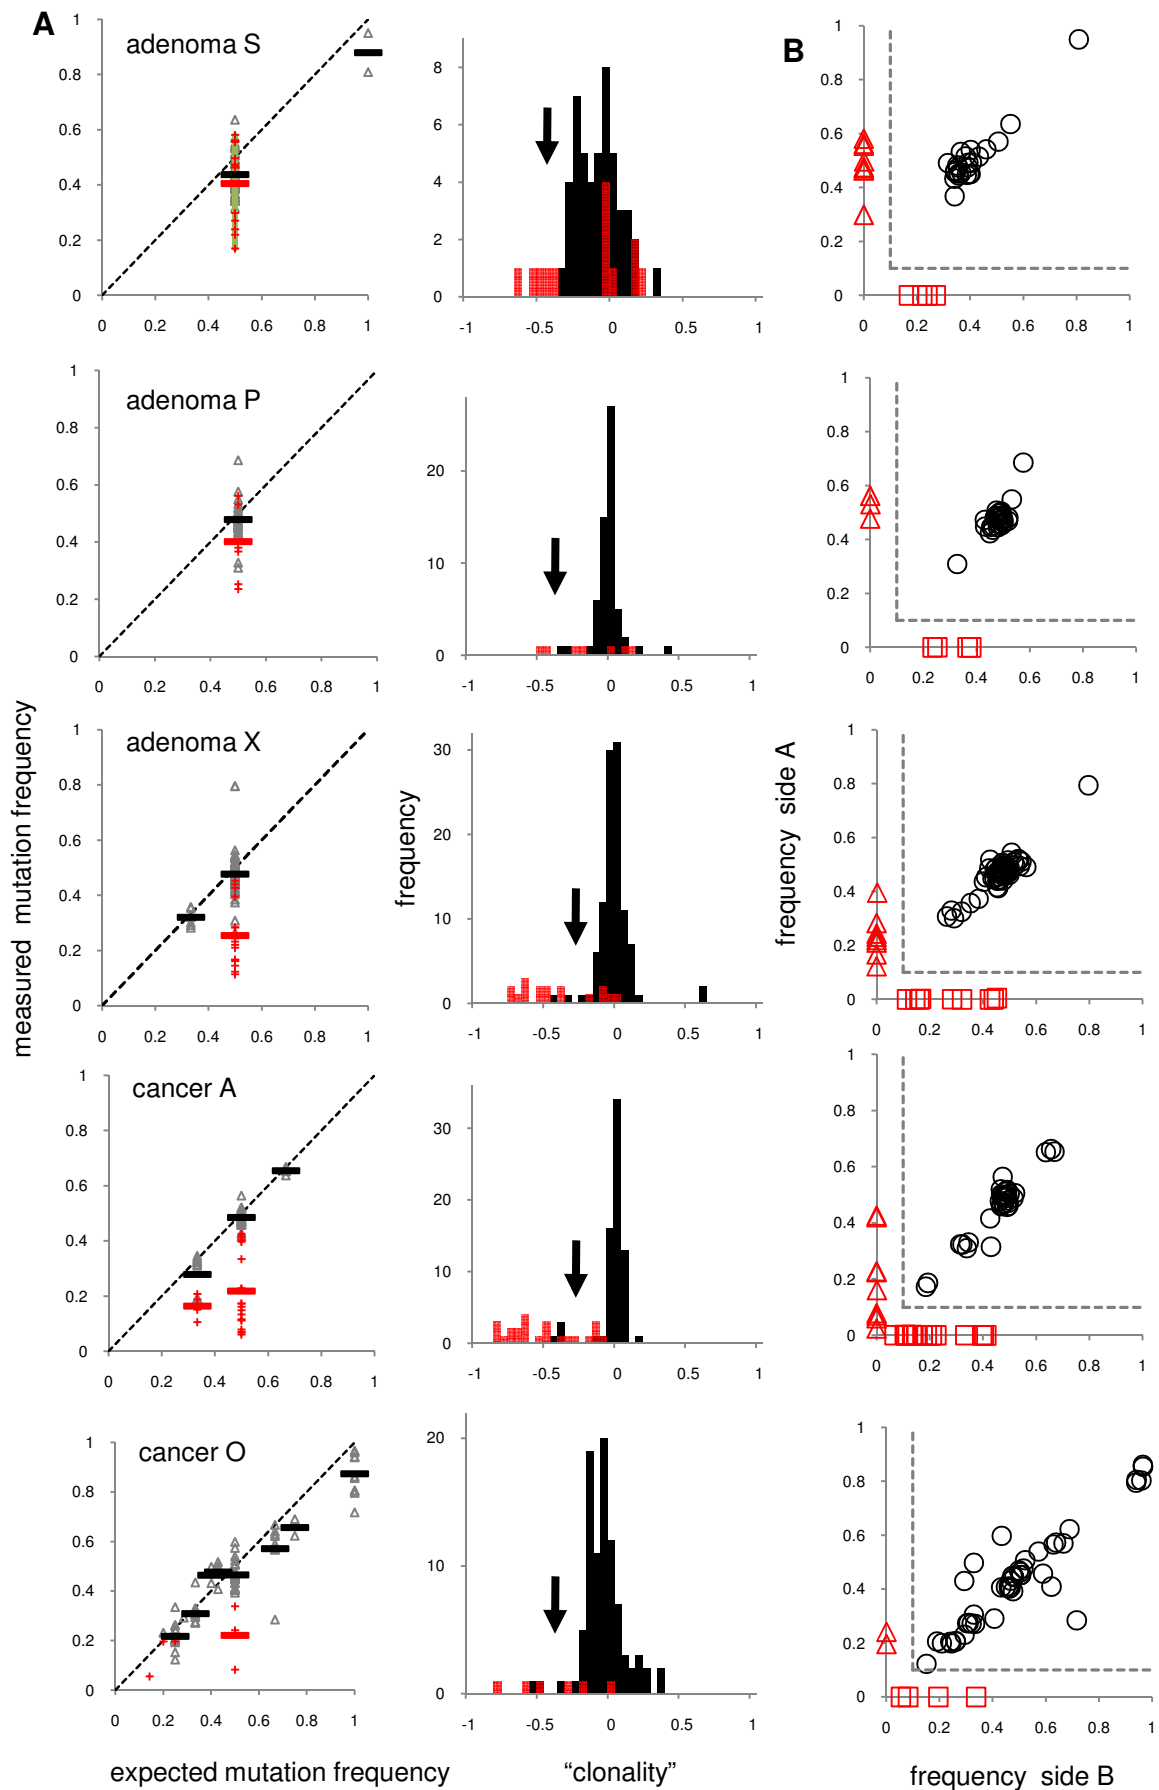

Supplemental Fig 1

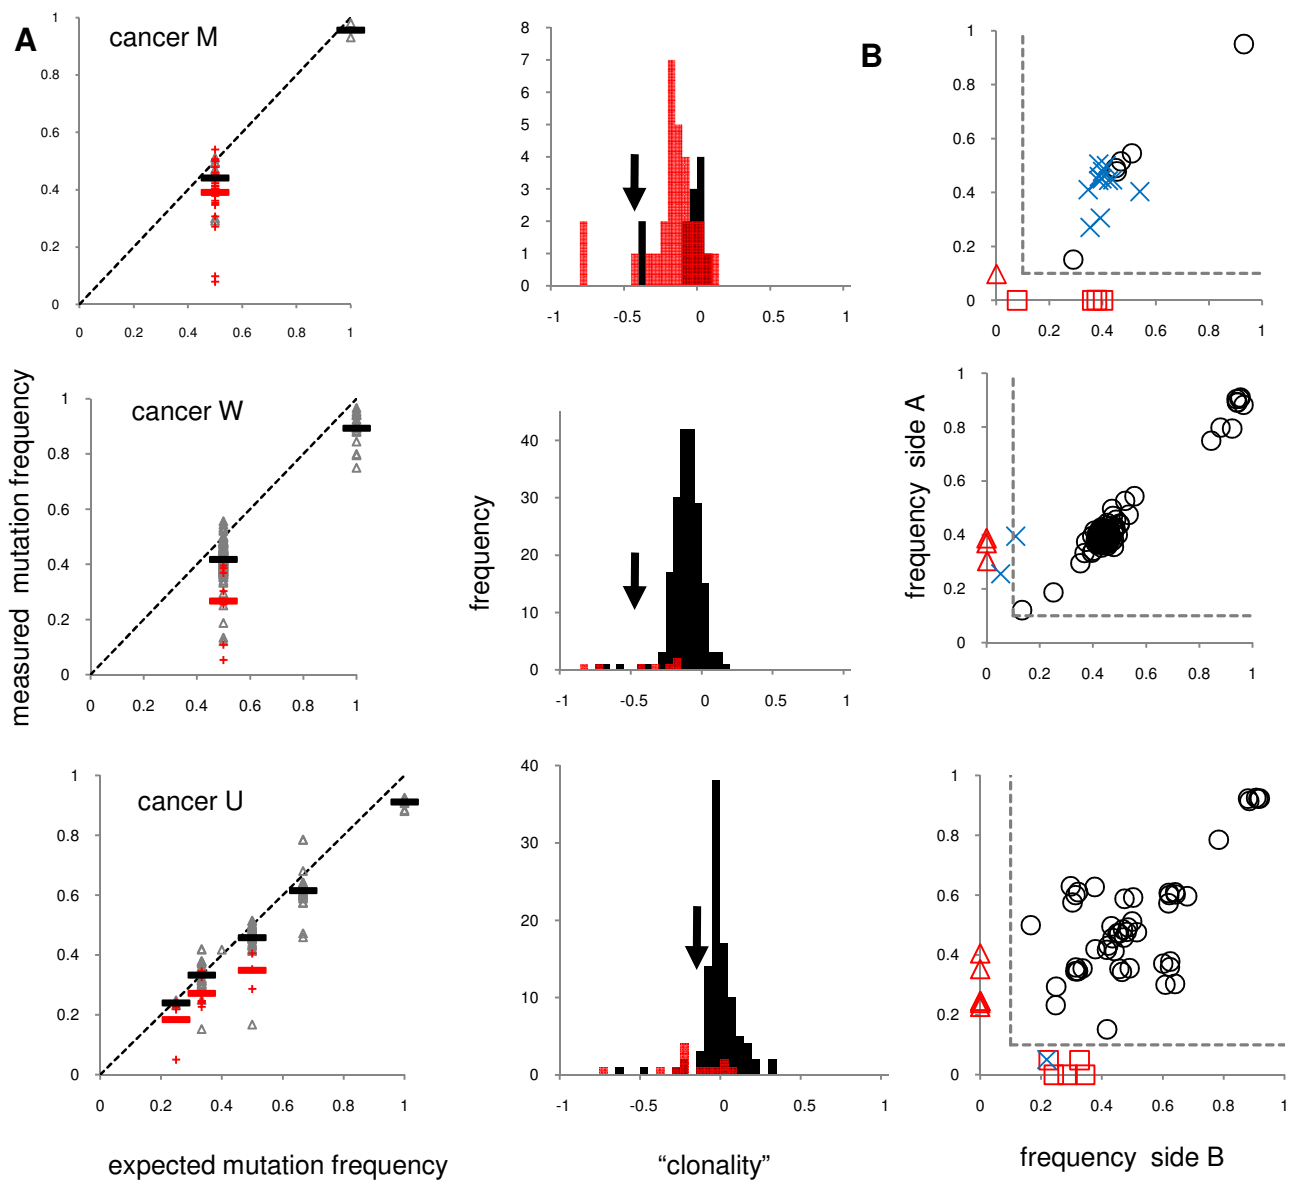

Supplemental Fig 1
